# Supplementary material
Source: PubMed Central journal article supplement (PMC10498332)
Supplement: jama-e2315231-s002.pdf [file jama-e2315231-s002.pdf]

## Data Sharing Statement

Raichlen. Sedentary Behavior and Incident Dementia Among Older Adults. *JAMA*. Published September 12, 2023. doi:10.1001/jama.2023.15231

### Data

**Data available:** Yes

**Data types:** Deidentified participant data, Data dictionary

**How to access data:** Data are available through the UK Biobank (<https://www.ukbiobank.ac.uk>)

**When available:** With publication

### Supporting Documents

**Document types:** None

### Additional Information

**Who can access the data:** Researchers must apply for access to the dataset through the UK Biobank.

**Types of analyses:** The UK Biobank makes determinations as to the types of analyses for which data will be made available.

**Mechanisms of data availability:** Data are available through application to the UK Biobank.
